# Supplementary material for: BMI-Stratified Exploration of the ‘Obesity Paradox’: Heart Failure Perspectives from a Large German Insurance Database
Source: MDPI journal article supplement (doi:10.3390/jcm13072086), 2024-04-03
Supplement: s1 [file s1]

**Table S1.** Used Health Problems 10<sup>th</sup> Revision (ICD-10 GM) codes.

| Health Problems 10th Revision (ICD-10 GM)              | Code                              |
|--------------------------------------------------------|-----------------------------------|
| Arterial hypertension (AHT)                            | I10.-, I11.-, I12.-, I13.-, I15.- |
| Diabetes mellitus (DM)                                 | E10.-, E11.-, E12.-, E13.-, E14.- |
| Dyslipidemia                                           | E78.-                             |
| Nicotine abuses                                        | F17.-                             |
| Myocardial Infarction (MI)                             | I21.-, I22.-                      |
| Previous stroke                                        | I63., I64.-, I69.3, I69.4         |
| Chronic Coronary syndrome (CCS)                        | I25.-                             |
| Atrial flutter/fibrillation (AFL/AF)                   | I48.-                             |
| Peripheral artery disease (PAD)                        | I70.2-                            |
| Cerebrovascular disease (CeVD)                         | I65.-, I66.-, I67.2,              |
| Chronic kidney disease (CKD)                           | N18.-, N19.-                      |
| Acute renal failure (ARF)                              | N17                               |
| Ischemic cardiomyopathy (ICM)                          | I25.5                             |
| Dilated cardiomyopathy (DCM)                           | I42.0                             |
| Hypertrophic obstructive cardiomyopathy (HOCM)         | I42.1                             |
| Hypertrophic cardiomyopathy (HCM)                      | I42.2                             |
| Arrhythmogenic right ventricular cardiomyopathy (ARVC) | I42.80                            |
| Obesity                                                | E66.-                             |
| Obesity grade I                                        | E66.00                            |
| Obesity grade II                                       | E66.01                            |
| Obesity grade III                                      | E66.06, E66.07, E66.08            |
| Obesity unspecified                                    | E66.09                            |
| Iron deficiency                                        | D50.0                             |
| Obstructive sleep apnea syndrome (OSAS)                | G47.31                            |
| Left bundle branch block (LBBB)                        | I44.7                             |
| Left/right heart failure (L/RHF)                       | I50.1/I50.0                       |
| Malignancies                                           | C00-C97                           |

|                                       |                                |
|---------------------------------------|--------------------------------|
| Presence of electronic cardiac device | Z95.0                          |
| Dyspnea                               | R06.0                          |
| Oedema                                | R60.-+R18                      |
| NYHA classes I/II/III/IV              | I50.11/ I50.12/ I50.13/ I50.14 |
| Shock                                 | R57.0                          |

**Table S2.** Used Anatomical Therapeutic Chemical classification system (ATC) codes.

| Anatomical Therapeutic Chemical classification system (ATC)              | Code                |
|--------------------------------------------------------------------------|---------------------|
| Platelet activation inhibition (PAI)                                     | B01AC               |
| Oral anticoagulation (OAC)                                               | B01AE, B01AA, B01AF |
| Angiotensin receptor inhibitors/ angiotensin receptor blocker (ACEi/ARB) | C09                 |
| Betablockers                                                             | C07                 |
| Diuretics                                                                | C03A, C03B, C03E    |
| Ivabradine                                                               | C01EB17             |
| Mineralocorticoid receptor antagonist (MRA)                              | C03DA               |
| Sodium glucose cotransporter-2 inhibitor (SGLT-2i)                       | A10BK               |
| Digitalis                                                                | C01AA               |
| Statin                                                                   | ATC C10AA           |

**Table S3.** Used German procedure classification system (OPS) codes.

| German procedure classification system (OPS) | Code                |
|----------------------------------------------|---------------------|
| Percutaneous coronary intervention (PCI)     | 8-83                |
| Coronary artery bypass grafting (CABG)       | 5-36                |
| Renal replacement therapy                    | 8-853, 8-855, 8-854 |
| Left ventricle support                       | 8-83                |
| Resuscitation                                | 8-77                |

**Table S4.** Hazard ratios of the different obesity stages regarding Cox regression models for freedom from rehospitalization.

| New York Heart Association (NYHA) | Obesity degree I  | Obesity degree II | Obesity degree III | Obesity of unknown degree |
|-----------------------------------|-------------------|-------------------|--------------------|---------------------------|
| No NYHA                           | 1.19 (1.04; 1.34) | 1.45 (1.25; 1.69) | 2.0 (1.59; 2.50)   | 1.29 (1.18; 1.41)         |
| NYHA I                            | 1.74 (0.99; 3.06) | 1.45 (1.25; 1.69) | 2.0 (1.59; 2.50)   | 1.29 (1.18; 1.41)         |
| NYHA II                           | 0.90 (0.64; 1.27) | 0.93 (0.37; 2.36) | 2.70 (1.03; 7.09)  | 1.62 (1.10; 2.37)         |
| NYHA III                          | 0.98 (0.78; 1.22) | 1.21 (0.79; 1.86) | 1.29 (0.67; 2.48)  | 1.06 (0.83; 1.34)         |
| NYHA IV                           | 0.89 (0.73; 1.08) | 1.30 (1.01; 1.68) | 1.79 (1.29; 2.48)  | 1.17 (1.01; 1.34)         |

**Table S5.** Hazard ratios of the different obesity stages regarding Cox regression models for overall survival

| New York Heart Association (NYHA) | Obesity degree I  | Obesity degree II | Obesity degree III | Obesity of unknown degree |
|-----------------------------------|-------------------|-------------------|--------------------|---------------------------|
| No NYHA                           | 0.86 (0.79; 0.93) | 0.95 (0.86; 1.26) | 1.06 (0.89; 1.26)  | 0.97 (0.92;1.03)          |
| NYHA I                            | 0.73 (0.43; 1.24) | 1.11 (0.63; 1.96) | 1.17 (0.51; 2.70)  | 1.00 (0.72; 1.37)         |
| NYHA II                           | 0.80 (0.61; 1.04) | 1.08 (0.77; 1.52) | 1.32 (0.76; 2.30)  | 0.78 (0.64; 0.94)         |
| NYHA III                          | 0.99 (0.84; 1.16) | 0.96 (0.77; 1.19) | 1.28 (0.95; 1.73)  | 0.89 (0.79; 1.00)         |
| NYHA IV                           | 0.90 (0.80; 1.02) | 0.99 (0.86; 1.13) | 0.98 (0.78; 1.24)  | 0.98 (0.91;1.06)          |
